# Supplementary material
Source: publisher figshare collection journal article supplement (https://acs.figshare.com/ndownloader/files/4471108)
Supplement: Supplementary file 1 [file 4471108]

# Implications of Compensating Property-Owners for Geologic Sequestration of CO<sub>2</sub>

R. Lee Gresham,<sup>\*,†</sup> Sean T. McCoy,<sup>†</sup> Jay Apt,<sup>†,§</sup> and M. Granger Morgan<sup>†</sup>

*Carnegie Mellon University, <sup>†</sup>Department of Engineering & Public Policy  
and <sup>§</sup>Tepper School of Business  
5000 Forbes Avenue, Baker Hall 129  
Pittsburgh, PA 15213*

\*Corresponding author phone: (412) 953-4617; fax: (412) 268-3757;  
email: rgresham@andrew.cmu.edu

## Supporting Information

|                                                                                                                                                                                    |           |
|------------------------------------------------------------------------------------------------------------------------------------------------------------------------------------|-----------|
| <b>Model Input Parameters .....</b>                                                                                                                                                | <b>2</b>  |
| <b>Table S1: Model Input Parameters .....</b>                                                                                                                                      | <b>4</b>  |
| <b>Irreducible Brine Saturation .....</b>                                                                                                                                          | <b>4</b>  |
| <b>CO<sub>2</sub> Plume Distribution Model: Analytical Solution Derivation .....</b>                                                                                               | <b>5</b>  |
| <b>Estimated Oil &amp; Gas Field CO<sub>2</sub> Sequestration Capacities in the MRCSP Region.....</b>                                                                              | <b>9</b>  |
| <b>Table S2: Oil &amp; gas field CO<sub>2</sub> Sequestration Capacities in the MRCSP Region.....</b>                                                                              | <b>9</b>  |
| <b>CO<sub>2</sub> Plume Size Results .....</b>                                                                                                                                     | <b>9</b>  |
| <b>Figure S1: Medina Sandstone Estimated CO<sub>2</sub> Plume Footprint Using the Nordbotten et al. Solution .....</b>                                                             | <b>9</b>  |
| <b>Figure S2: Oriskany Sandstone Estimated CO<sub>2</sub> Plume Footprint Using the Nordbotten et al. Solution .....</b>                                                           | <b>10</b> |
| <b>Figure S3: Clinton Sandstone Estimated CO<sub>2</sub> Plume Footprint Using the Nordbotten et al. Solution .....</b>                                                            | <b>10</b> |
| <b>Figure S4: Rose Run Sandstone Estimated CO<sub>2</sub> Plume Footprint Using the Nordbotten et al. Solution .....</b>                                                           | <b>11</b> |
| <b>CO<sub>2</sub> Plume Model Sensitivity.....</b>                                                                                                                                 | <b>11</b> |
| <b>Figure S5: Medina Sandstone Rank Order Correlation Between the Results of the Monte Carlo Sensitivity Analysis and the Parameters Assigned Triangular Distributions .....</b>   | <b>11</b> |
| <b>Figure S6: Oriskany Sandstone Rank Order Correlation Between the Results of the Monte Carlo Sensitivity Analysis and the Parameters Assigned Triangular Distributions .....</b> | <b>12</b> |

|                                                                                                                                                                                    |           |
|------------------------------------------------------------------------------------------------------------------------------------------------------------------------------------|-----------|
| <b>Figure S7: Clinton Sandstone Rank Order Correlation Between the Results of the Monte Carlo Sensitivity Analysis and the Parameters Assigned Triangular Distributions .....</b>  | <b>12</b> |
| <b>Figure S8: Rose Run Sandstone Rank Order Correlation Between the Results of the Monte Carlo Sensitivity Analysis and the Parameters Assigned Triangular Distributions .....</b> | <b>13</b> |
| <b>Distribution of Pore Space Acquisition Costs .....</b>                                                                                                                          | <b>13</b> |
| <b>Table S3: Total Lease Cost vs. Purchase Cost .....</b>                                                                                                                          | <b>14</b> |
| <b>Pipeline Model Design and Assumptions.....</b>                                                                                                                                  | <b>14</b> |
| <b>Figure S9: Pipeline from PA/OH to the Mt. Simon and Frio Sandstones .....</b>                                                                                                   | <b>15</b> |
| <b>Pipeline Model Annualized Costs .....</b>                                                                                                                                       | <b>16</b> |
| <b>Table S4: Pipeline Annualized Costs .....</b>                                                                                                                                   | <b>16</b> |
| <b>Figure S10: Cost Difference Between Mattoon Pipeline &amp; Pore Space Lease Cost and MRCSP Pore Space Lease Cost.....</b>                                                       | <b>17</b> |
| <b>Figure S11: Cost Difference Between Frio Pipeline &amp; Pore Space Lease Cost and MRCSP Pore Space Lease Cost.....</b>                                                          | <b>17</b> |
| <b>Literature Cited .....</b>                                                                                                                                                      | <b>18</b> |

## Model Input Parameters

The model requires eight input parameters: formation depth, net thickness, porosity, permeability, salinity, temperature and pressure. Formation thickness, porosity, permeability, and depth can vary by several orders of magnitude among and within reservoirs and have large effects on injections rates. The parameterized and deterministic inputs to the model are show in Table S1.

**Formation Depth, Net Thickness, Porosity and Salinity.** Formation depth is the depth of the geological formation below the surface (meters). Formation thickness is the net thickness of the permeable zones of the geological formation (meters). Net thickness is used because formations typically have zones of high permeability inter-layered with low-permeability zones. Effective porosity is the percentage of the volume of connected pores in a unit volume of the formation. Porosity generally decreases with depth (*I*), but in this case, no statistically significant

correlation between porosity and depth exists in the data for the four Pennsylvania and Ohio sandstones analyzed in this paper. Since the net thickness of high-permeability zones is used in this model, the effective porosity of high permeability zones is also used here. Salinity is the amount of dissolved NaCl in the interstitial pore water in the target formation, expressed as part per million by weight (ppm).

**Formation Pressure.** The relationship between pressure and depth is modeled as linear under hydrostatic conditions. At hydrostatic conditions, pressure typically increases at approximately 10 MPa/km. The relationship is expressed as:

$$P_d = G_p d + P_a \quad [MPa]$$

where  $P_d$  is pressure as a function of depth,  $G_p$  is the hydrostatic pressure gradient, 10 MPa/km,  $d$  is formation depth, and  $P_a$  is atmospheric pressure.

**Formation Temperature.** The relationship between temperature and depth is also modeled using a linear approximation. The average geothermal gradient is assumed to be approximately 25°C/km, but because actual temperature gradients vary somewhat from one region to another, a triangular distribution is assigned to the geothermal gradient for Monte Carlo simulations carried out in this analysis (see Table S1). The relationship between temperature and depth is expressed as:

$$T_d = G_T d + T_s \quad [K]$$

where  $T_d$  is temperature as a function of depth,  $G_T$  is the geothermal gradient,  $d$  is formation depth, and  $T_s$  is the surface temperature.

**Table S1: Model Input Parameters**

|                                  | Depth<br>(m) | Net<br>Thickness<br>(m) | Porosity<br>(%) | Salinity<br>(ppm) | Irreducible Brine<br>Saturation (%) | CO <sub>2</sub><br>Saturation <sup>2</sup><br>(%) | Temperature<br>Gradient<br>(°C/km) |
|----------------------------------|--------------|-------------------------|-----------------|-------------------|-------------------------------------|---------------------------------------------------|------------------------------------|
| <b>Frio Sandstone (TX)</b>       |              |                         |                 |                   |                                     |                                                   |                                    |
| <i>Deterministic</i>             | 1,900        | 300                     | 30              | 100,000           | 30%                                 | 70%                                               | 25                                 |
| <b>Mt. Simon Sandstone (IL)</b>  |              |                         |                 |                   |                                     |                                                   |                                    |
| <i>Deterministic</i>             | 2,300        | 90 <sup>1</sup>         | 13              | 125,000           | 30%                                 | 70%                                               | 25                                 |
| <b>Medina Sandstone (PA)</b>     |              |                         |                 |                   |                                     |                                                   |                                    |
| <i>Triangular: Min</i>           | 810          | 10                      | 3%              | 100,000           | 30%                                 | 70%                                               | 20                                 |
| <i>Max</i>                       | 2,000        | 57                      | 18%             | 250,000           | 90%                                 | 10%                                               | 50                                 |
| <i>Mode</i>                      | 1,500        | 20                      | 8%              | 190,000           | 60%                                 | 40%                                               | 30                                 |
| <b>Volant Field</b>              |              |                         |                 |                   |                                     |                                                   |                                    |
| <i>Deterministic</i>             | 1,800        | 26                      | 18%             | 230,000           | 30%                                 | 70%                                               | 25                                 |
| <b>Oriskany Sandstone (PA)</b>   |              |                         |                 |                   |                                     |                                                   |                                    |
| <i>Triangular: Min</i>           | 2,000        | 10                      | 2%              | 250,000           | 30%                                 | 70%                                               | 20                                 |
| <i>Max</i>                       | 2,800        | 41                      | 10%             | 350,000           | 90%                                 | 10%                                               | 50                                 |
| <i>Mode</i>                      | 2,700        | 13                      | 5%              | 340,000           | 60%                                 | 40%                                               | 30                                 |
| <b>Clinton Sandstone (OH)</b>    |              |                         |                 |                   |                                     |                                                   |                                    |
| <i>Triangular: Min</i>           | 830          | 11                      | 7%              | 100,000           | 30%                                 | 70%                                               | 20                                 |
| <i>Max</i>                       | 1,700        | 20                      | 10%             | 210,000           | 90%                                 | 10%                                               | 50                                 |
| <i>Mode</i>                      | 1,100        | 11                      | 8%              | 130,000           | 60%                                 | 40%                                               | 30                                 |
| <b>E. Canton Consol.-S Field</b> |              |                         |                 |                   |                                     |                                                   |                                    |
| <i>Deterministic</i>             | 1,600        | 13                      | 8%              | 200,000           | 30%                                 | 70%                                               | 25                                 |
| <b>Rose Run Sandstone (OH)</b>   |              |                         |                 |                   |                                     |                                                   |                                    |
| <i>Triangular: Min</i>           | 830          | 10                      | 8%              | 100,000           | 30%                                 | 70%                                               | 20                                 |
| <i>Max</i>                       | 2,300        | 12                      | 10%             | 280,000           | 90%                                 | 10%                                               | 50                                 |
| <i>Mode</i>                      | 1,600        | 11                      | 8%              | 200,000           | 60%                                 | 40%                                               | 30                                 |
| <b>Baltic Field</b>              |              |                         |                 |                   |                                     |                                                   |                                    |
| <i>Deterministic</i>             | 1,900        | 12                      | 10%             | 240,000           | 30%                                 | 70%                                               | 25                                 |

<sup>1</sup>To provide a conservative estimate that accounts for uncertainty with respect to permeability and porosity in the Mt. Simon Sandstone at the Mattoon site, half the value of the gross thickness reported by the Illinois Geological Survey was used in our analysis (2,3,).

<sup>2</sup>CO<sub>2</sub> saturation is not actually an input parameter to the plume distribution model, but rather the outcome resulting from the assumed parameterized irreducible brine saturation.

## Irreducible Brine Saturation

Brennan and Burruss note that as the interstitial pore water that is not displaced by injected CO<sub>2</sub> (i.e., irreducible brine) in the sequestration reservoir increases, storage capacity (in mass per unit volume) decreases, and the areal extent of the CO<sub>2</sub> plume becomes larger (4). Brennan and Burruss performed their storage capacity analysis applying irreducible water saturations at 5%, 50%, 75%, and 100% (4). Numerical simulations of CO<sub>2</sub> plume migration in the Frio injection project best match the observed behavior at irreducible brine saturations of between 15% and

30% (5). Therefore, values for irreducible brine saturation were parameterized [Triangular (90,30,60)] and input into the model.

## CO<sub>2</sub> Plume Distribution Model: Analytical Solution Derivation (6)

Model predictions depend largely on the values of key parameters, which describe the properties of the formation and native fluids. Multiphase models solve a series of governing equations to predict the composition and volumetric fraction (i.e., the fraction of the formation pore space taken up by fluid) of each phase state (e.g., liquid, gas, supercritical fluid), as well as fluid pressures, as a function of location and time for a particular set of conditions.

The results obtained by Nordbotten et al. (2) agree broadly with Buckley-Leverett theory for small values of the dimensionless gravity factor,  $\Gamma$ . For convenience, their result is derived here using the similar assumptions—namely, effects of capillary pressure are negligible, fluids are incompressible, and the reservoir petrophysical properties are homogeneous—using arguments analogous to those used by Dake (7) for an unstable, horizontal displacement.

For a differential cylindrical volume of the system shown in Figure 1 of the paper, the volumetric balance on the CO<sub>2</sub> phase can be written:

$$\varphi \frac{\partial \bar{S}_c(r,t)}{\partial t} + \nabla \cdot q_c(r,t) = 0 \quad (\text{Eq. S1})$$

where:  $\bar{S}_c$  is the vertically averaged saturation of CO<sub>2</sub>,  $\varphi$  is the reservoir porosity,  $q_c$  is the flux of CO<sub>2</sub>,  $r$  represents radial distance from the injection well, and  $t$  is time. Assuming drainage (i.e., CO<sub>2</sub> is displacing brine in a brine-wet reservoir), the vertically averaged saturation of CO<sub>2</sub>,  $\bar{S}_c$ , is defined as:

$$\bar{S}_c = \beta(1 - S_{wc}) \quad (\text{Eq. S2})$$

Darcy's law for the brine and CO<sub>2</sub> phases can be written as:

$$q_c = -K\beta\lambda_c \nabla p_c \quad (\text{Eq. S3})$$

$$q_w = -K(1 - \beta)\lambda_w \nabla p_c \quad (\text{Eq. S4})$$

In Equations S3 and S4,  $K$  is the intrinsic permeability of the reservoir,  $\beta$  is the fraction of the reservoir thickness invaded by the CO<sub>2</sub> plume,  $\lambda_n$  is the mobility ( $k_r/u$ ) for the CO<sub>2</sub> phase ( $c$ ) or the brine phase ( $w$ ), and  $\nabla p$  is the pressure gradient.

Since the fluids are incompressible ( $\nabla \cdot q = 0$ ), the flux into the system equals the flux out of the system and the total apparent flux,  $q_t$ , is:

$$q_t = \frac{Q_{well}}{A} = q_c + q_w$$

where  $Q_{well}$  is the injection rate of CO<sub>2</sub> into the system and  $A$  is the area across which the flux occurs. Assuming capillary pressure is negligible and, therefore  $\nabla p_c = \nabla p_w = \nabla p$ , substituting Equations S3 and S4, we arrive at:

$$\frac{Q_{well}}{A} = -K[\beta\lambda_c + (1-\beta)\lambda_w]\nabla p \quad (\text{Eq. S5})$$

Solving Equation S5 for pressure gradient results in:

$$\nabla p = -\frac{Q_{well}}{KA[\beta\lambda_c + (1-\beta)\lambda_w]}$$

which can then be substituted into Equation S3 to arrive at the flux of the CO<sub>2</sub> phase as a function of the injection rate.

$$\nabla p = \frac{\beta\lambda_c}{\beta\lambda_c + (1-\beta)\lambda_w} \left( \frac{Q_{well}}{A} \right) = f_c \frac{Q_{well}}{A} \quad (\text{Eq. S6})$$

In Equation S6, the term referred to as  $f_c$  is the fractional flow of the carbon dioxide phase in the system. Substituting this equation into the volumetric balance, Equation S1 yields:

$$\varphi \frac{\partial \bar{S}_c}{\partial t} + \nabla \cdot \left( f_c \frac{Q_{well}}{A} \right) = 0$$

Writing the divergence operator for a cylindrical coordinate system gives:

$$\varphi \frac{\partial \bar{S}_c}{\partial t} + \frac{1}{r} \frac{\partial}{\partial r} \left( r f_c \frac{Q_{well}}{2\pi r h} \right) = 0$$

Simplifying results in:

$$\varphi \frac{\partial \bar{S}_c}{\partial t} + \frac{Q_{well}}{2\pi r h} \frac{\partial f_c}{\partial r} = 0 \quad (\text{Eq. S7})$$

Applying the chain rule to the fractional flow equation, the  $\partial f_c / \partial r$  can be rewritten:

$$\frac{\partial f_c}{\partial r} = \frac{\partial f_c}{\partial \bar{S}_c} \times \frac{\partial \bar{S}_c}{\partial r} = f'_c \frac{\partial \bar{S}_c}{\partial r}$$

Upon substitution into Equation S7, we arrive at a statement of the Buckley-Leverett equation for a radial system:

$$\frac{\partial \bar{S}_c}{\partial t} + \frac{Q_{well} f'_c}{2\pi r h \varphi} \frac{\partial \bar{S}_c}{\partial r} = 0 \quad (\text{Eq. S8})$$

This equation was solved by Woods and Comer (8) for the boundary conditions  $r = r_w$  at  $t = 0$ , resulting in:

$$r(\bar{S}_c) = \sqrt{\frac{f'_c Q_{well} t}{\pi h \varphi}} + r_w^2 \quad (\text{Eq. S9})$$

If vertically averaged saturation of the CO<sub>2</sub> phase was not assumed (i.e., Eq. S4), determination of  $f'_c$  would require an assumption of the shape of the relative permeability curves for the CO<sub>2</sub>-brine system and particular reservoir rock. However, operating under the assumption saturation is a linear average of phase saturations (i.e., Eq. S2),  $f'_c$  can be expressed via the chain rule as:

$$f'_c = \frac{df_c}{d\beta} \times \frac{\partial \beta}{\partial \bar{S}_c} = \frac{\lambda_w \lambda_c}{[\lambda_w + \beta(\lambda_c - \lambda_w)]^2} \left( \frac{1}{1 - S_{wc}} \right)$$

Substituting this into the above equation, we arrive at an expression for the radial distance as a function of the fraction of the formation height invaded by the CO<sub>2</sub> plume:

$$r(\beta) = \sqrt{\frac{\lambda_w \lambda_c Q_{well} t}{\pi h \varphi (1 - S_{wc}) [\lambda_w + \beta(\lambda_c - \lambda_w)]}} + r_w^2 \quad (\text{Eq. S10})$$

Assuming the injection well radius is much smaller than the radius of the CO<sub>2</sub> plume, the maximum extent of the CO<sub>2</sub> plume occurs at  $\beta = 0$ :

$$r_{\max} = \sqrt{\frac{\lambda_c V}{\pi h \varphi \lambda_w (1 - S_{wc})}} \quad [m] \quad (\text{Eq. S11})$$

In the situation where the dimensionless gravity factor,  $\Gamma$ , is large, the solution presented in Equation S11 under predicts the extent of migration of the CO<sub>2</sub>-brine interface. However, after incorporating the effects of buoyancy into the derivation (and making the same assumptions as above) Nordbotten et al. arrived at:

$$r_{\max} = \sqrt{\frac{(\lambda - 1)V}{2\pi \Lambda h \varphi (1 - S_{wc})}} \quad [m] \quad (\text{Eq. S12})$$

where  $\lambda$  is the mobility ratio for the displacement ( $\lambda_c / \lambda_w$ ), and  $\Lambda$  is the Lagrangian multiplier. The Lagrangian multiplier,  $\Lambda$ , comes from the numerical solution of:

$$\Lambda(\lambda - 1)^2 - \Gamma(\lambda - 1) + \Gamma \lambda \ln\left(\frac{\Gamma + \Lambda}{\Lambda \lambda}\right) = \frac{2\lambda[\Lambda(\lambda - 1) - \Gamma]^2}{\lambda - 1} \quad (\text{Eq. S13})$$



## Estimated Oil & Gas Field CO<sub>2</sub> Sequestration Capacities in the MRCSP Region

**Table S2:** Oil & Gas Field CO<sub>2</sub> Sequestration Capacities in the MRCSP Region (9,10)

| Producing Formation | Field Name               | State | Field Size (km <sup>2</sup> ) | GS Potential (million tonnes) |
|---------------------|--------------------------|-------|-------------------------------|-------------------------------|
| Medina              | Volant                   | PA    | 130                           | 310                           |
| Clinton             | E. Canton Consolidated-S | OH    | 490                           | 250                           |
| Rose Run            | Baltic                   | OH    | 340                           | 230                           |

## CO<sub>2</sub> Plume Size Results

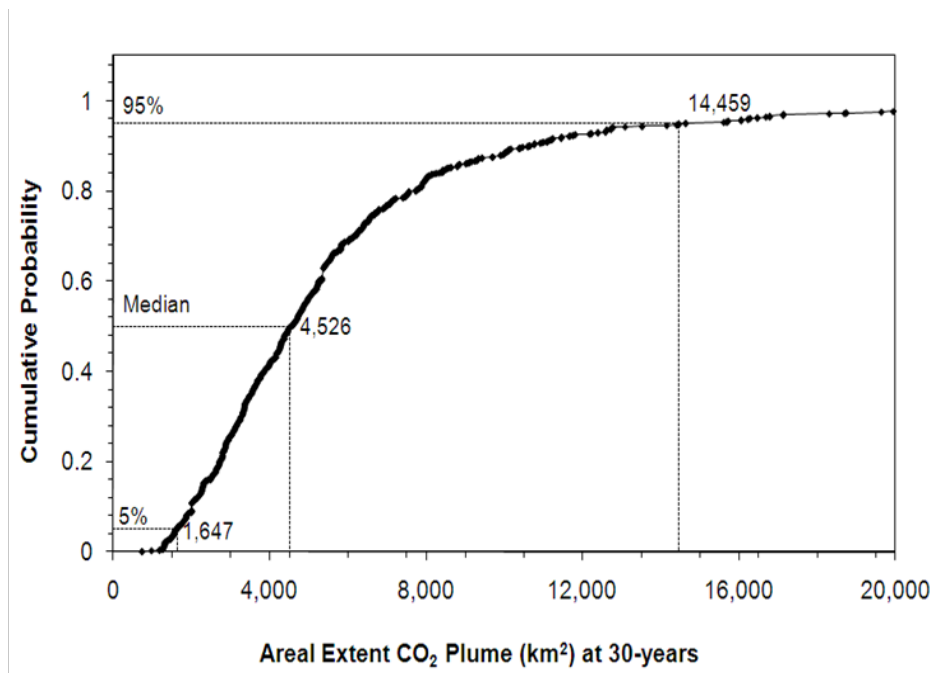

**Figure S1:** Medina Sandstone estimated CO<sub>2</sub> plume footprint using the Nordbotten et al. solution.

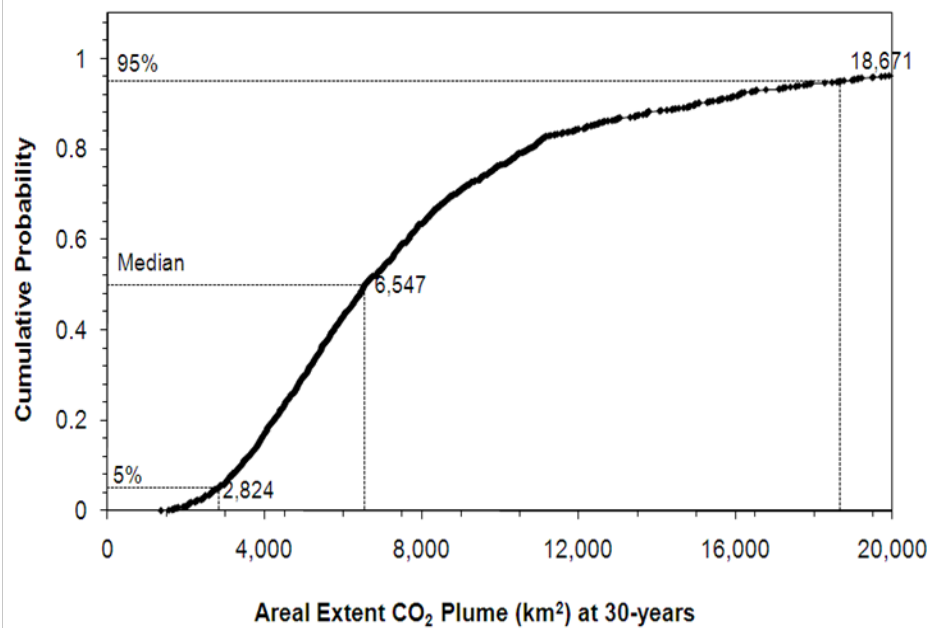

**Figure S2:** Oriskany Sandstone estimated CO<sub>2</sub> plume footprint using the Nordbotten et al. solution.

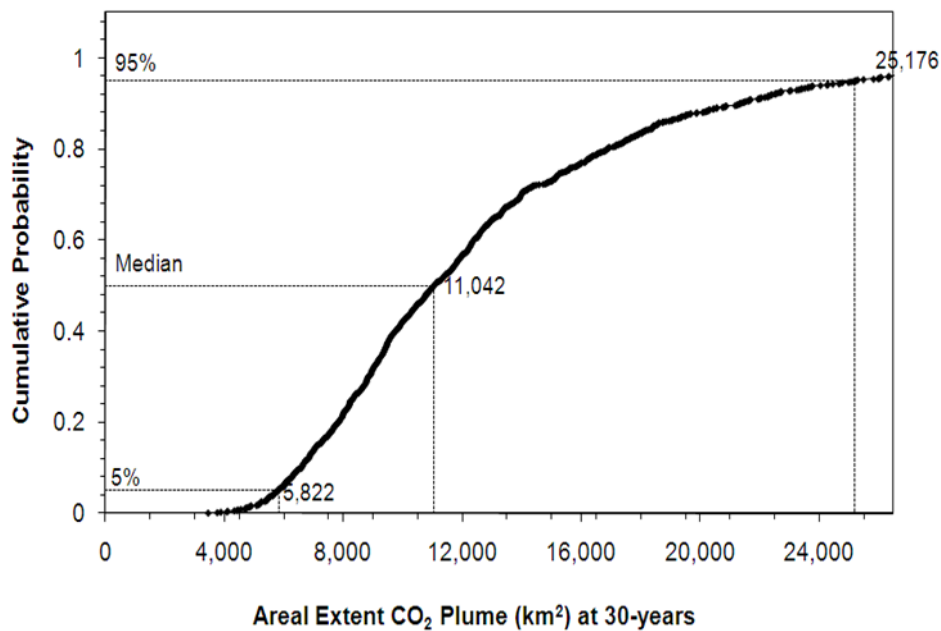

**Figure S3:** Clinton Sandstone estimated CO<sub>2</sub> plume footprint using the Nordbotten et al. solution.

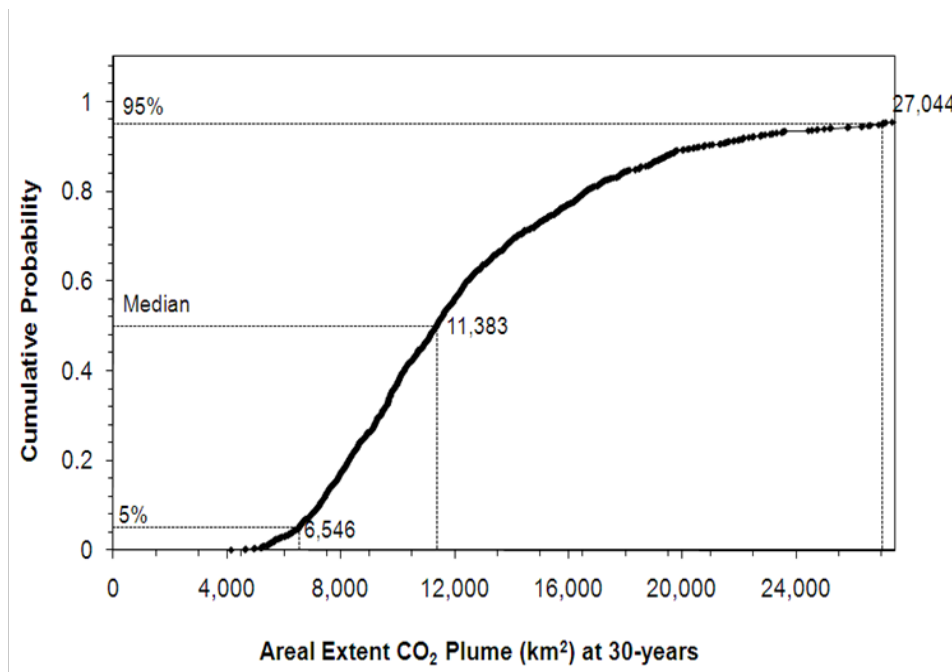

**Figure S4:** Rose Run Sandstone estimated CO<sub>2</sub> plume footprint using the Nordbotten et al. solution.

## CO<sub>2</sub> Plume Model Sensitivity

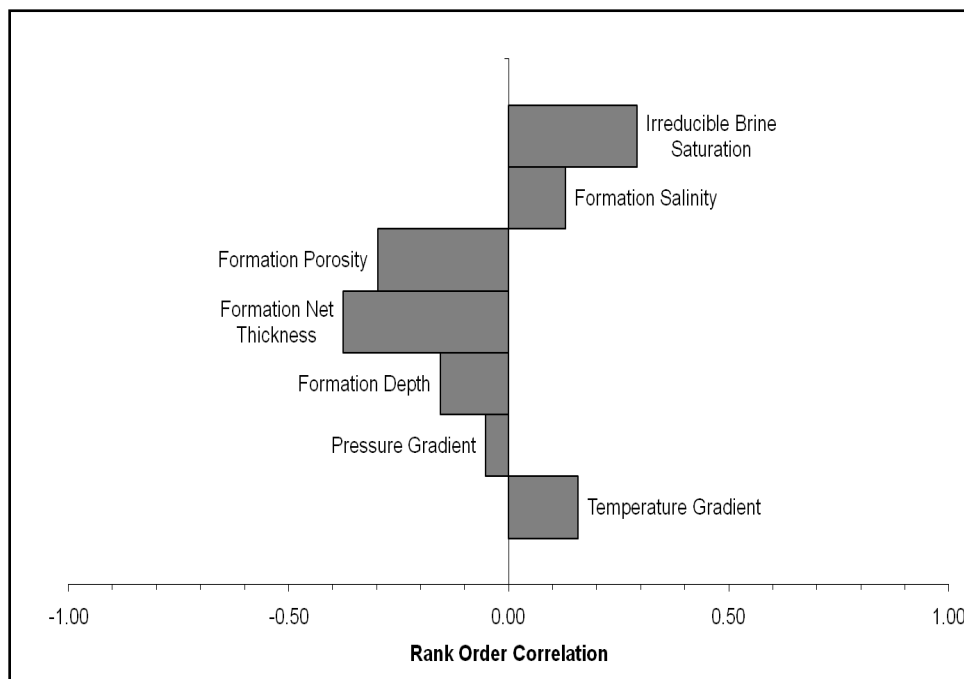

**Figure S5:** Medina Sandstone rank order correlation between the results of the Monte Carlo sensitivity analysis and the parameters assigned triangular distributions.

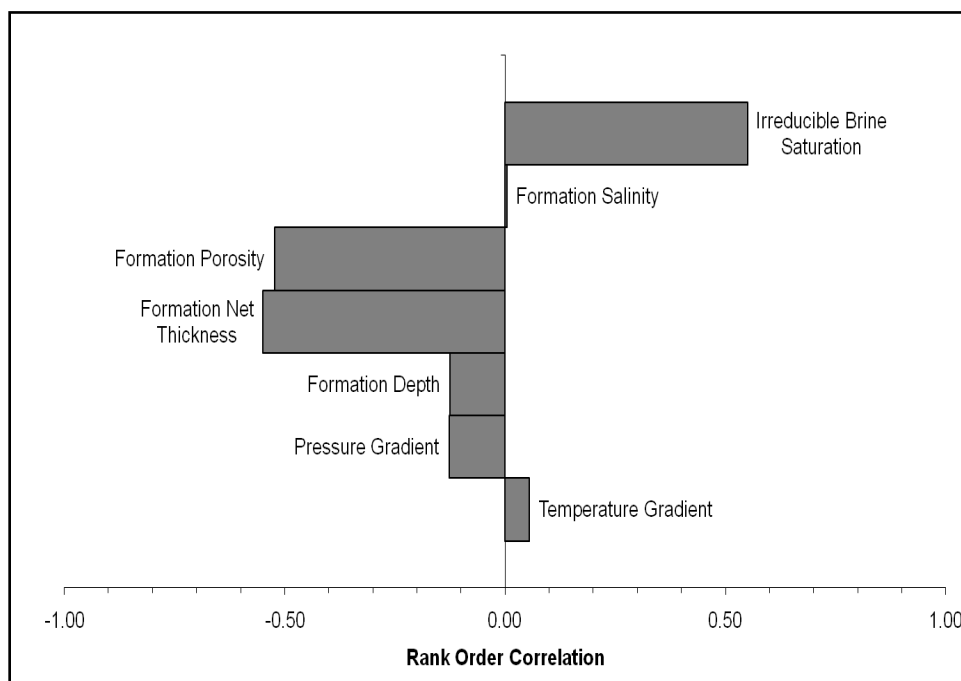

**Figure S6:** Oriskany Sandstone rank order correlation between the results of the Monte Carlo sensitivity analysis and the parameters assigned triangular distributions.

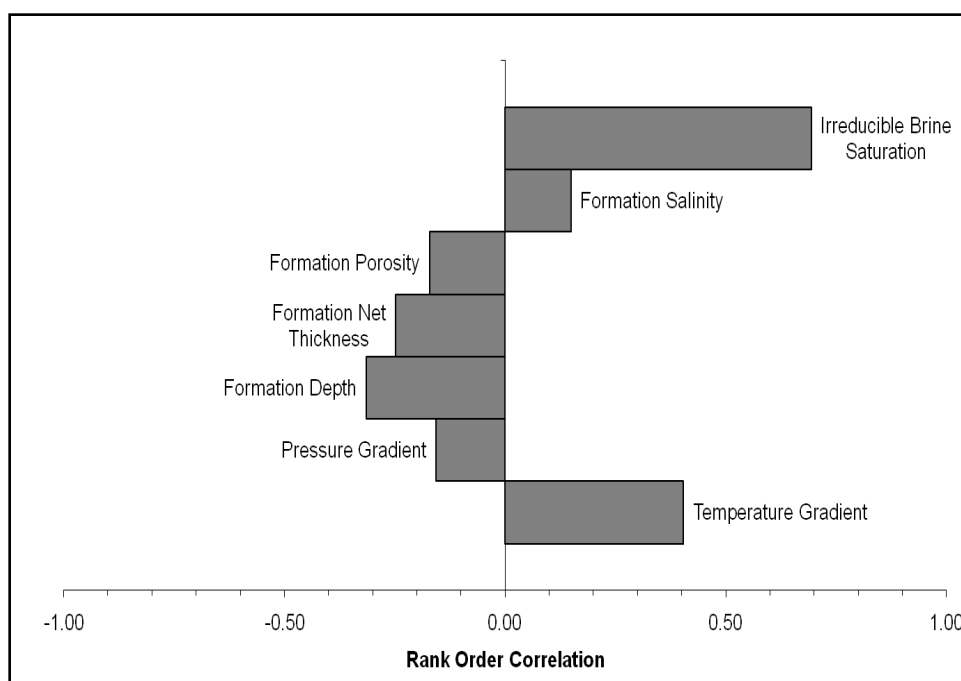

**Figure S7:** Clinton Sandstone rank order correlation between the results of the Monte Carlo sensitivity analysis and the parameters assigned triangular distributions.

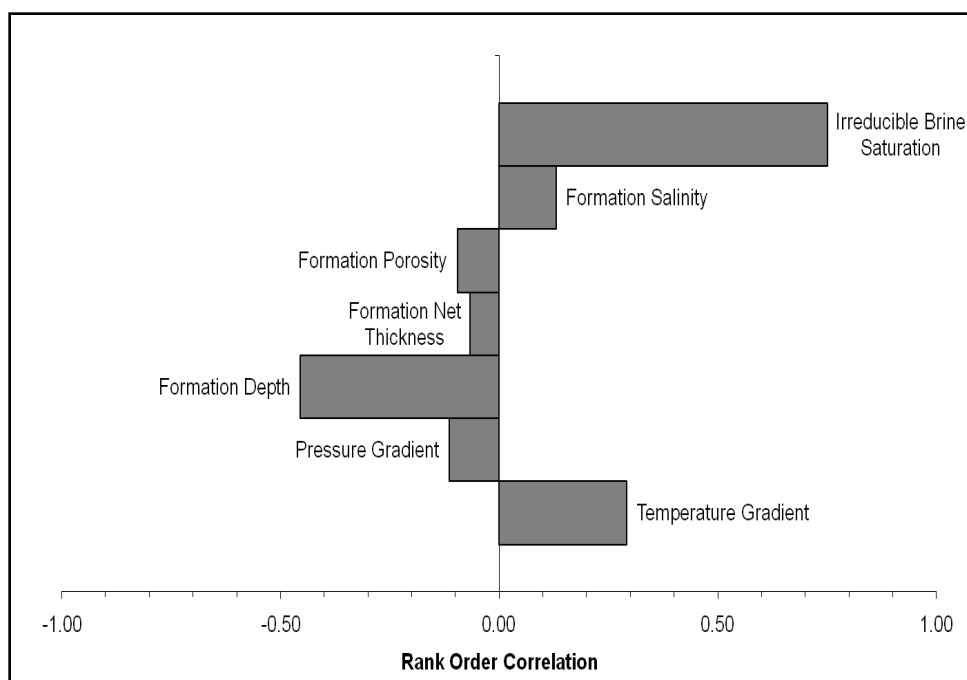

**Figure S8:** Rose Run Sandstone rank order correlation between the results of the Monte Carlo sensitivity analysis and the parameters assigned triangular distributions.

## Distribution of Pore Space Acquisition Costs

The value of the one-time payment for the long-term lease is assumed to be \$500, the equivalent sum paid to landowners in Illinois for the option to lease pore space rights for the FutureGen™ Alliance project (11). Even if as many as 120 (the number assumed for this paper) landowners fall within the areal extent of the CO<sub>2</sub> plume, the \$60,000 expenditure to secure the option to lease is insignificant compared to the total lease cost. If the CO<sub>2</sub> plume underlies more densely populated areas, the option cost would no longer be insignificant. Because GS developers will only acquire a servitude (i.e., the “right to use”) under a lease instrument instead of a fee title (i.e., the full possessory right) if sequestration rights are purchased, it makes sense that, on balance, less compensation will be paid for a sequestration lease than a full fee interest in the pore space

**Table S3:** Present Value 100-year Lease Cost vs. Purchase Cost (millions 2009\$)<sup>1</sup>

|                                   | <b>Annual Lease<sup>a</sup></b> |               | <b>Long-Term Lease<sup>b</sup></b> |              | <b>Purchase Cost<sup>b</sup></b> |               |
|-----------------------------------|---------------------------------|---------------|------------------------------------|--------------|----------------------------------|---------------|
|                                   | <i>Private</i>                  | <i>State</i>  | <i>Private</i>                     | <i>State</i> | <i>Private</i>                   | <i>State</i>  |
| <b>Medina (PA)</b>                |                                 |               |                                    |              |                                  |               |
| <i>5<sup>th</sup> Percentile</i>  | \$7.6-41                        | \$180-270     | \$2.5-13                           | \$50-79      | \$8.3-45                         | \$170-270     |
| <i>Median</i>                     | \$21-110                        | \$500-700     | \$6.8-35                           | \$140-200    | \$23-120                         | \$490-690     |
| <i>95<sup>th</sup> Percentile</i> | \$62-350                        | \$1,500-2,200 | \$20-110                           | \$440-640    | \$67-380                         | \$1,500-2,200 |
| <b>Oriskany (PA)</b>              |                                 |               |                                    |              |                                  |               |
| <i>5<sup>th</sup> Percentile</i>  | \$13-61                         | \$280-400     | \$4.2-20                           | \$80-120     | \$14-66                          | \$270-400     |
| <i>Median</i>                     | \$33-150                        | \$700-1,000   | \$11-49                            | \$200-300    | \$36-170                         | \$680-1,000   |
| <i>95<sup>th</sup> Percentile</i> | \$91-420                        | \$1,900-2,800 | \$29-130                           | \$540-830    | \$98-460                         | \$1,800-2,800 |
| <b>Clinton (OH)</b>               |                                 |               |                                    |              |                                  |               |
| <i>5<sup>th</sup> Percentile</i>  | \$27-130                        | \$610-860     | \$8.7-42                           | \$170-250    | \$29-140                         | \$590-860     |
| <i>Median</i>                     | \$49-260                        | \$1,100-1,600 | \$16-82                            | \$320-490    | \$54-280                         | \$1,100-1,700 |
| <i>95<sup>th</sup> Percentile</i> | \$120-620                       | \$2,900-3,700 | \$38-200                           | \$820-1,200  | \$130-670                        | \$2,800-3,700 |
| <b>Rose Run (OH)</b>              |                                 |               |                                    |              |                                  |               |
| <i>5<sup>th</sup> Percentile</i>  | \$28-140                        | \$640-930     | \$9.1-46                           | \$180-270    | \$31-160                         | \$620-940     |
| <i>Median</i>                     | \$52-260                        | \$1,200-1,700 | \$17-84                            | \$330-500    | \$57-290                         | \$1,100-1,700 |
| <i>95<sup>th</sup> Percentile</i> | \$120-590                       | \$2,700-3,900 | \$40-190                           | \$760-1,100  | \$140-640                        | \$2,600-3,900 |

<sup>1</sup>Assumes 15% discount rate and 4% inflation rate.<sup>a</sup>Annual lease rate range \$2-10 per acre per year for private land, and \$45-65 per acre per year for private land.<sup>b</sup>Long-term lease rate and purchase cost range \$20-100 per acre for private land, and \$400-600 per acre for state-owned land.

## Pipeline Model Design and Assumptions

Operating pressures throughout the pipeline remain above 10.3 MPa to ensure the CO<sub>2</sub> does not fall into a subcritical state (12,13). Injection pressure, booster compressors, and pipeline diameter all influence pipeline pressure. A fixed size is assumed for both injection and booster compressors. To ensure CO<sub>2</sub> remains supercritical throughout the pipeline, the required diameter for a pipeline segment is sized according to operating parameters such as pressure drop, CO<sub>2</sub> density and mass flow rate, and frictional losses (12,14). Pipeline diameter is calculated while holding the upstream and downstream pressures constant (12). Depending on the pipeline length,

additional pumping stations might be required to boost the pressure along the pipeline to compensate for pressure losses (12,14). It is assumed a booster station is required when the length of a pipeline segment exceeds 205 miles (402 km).

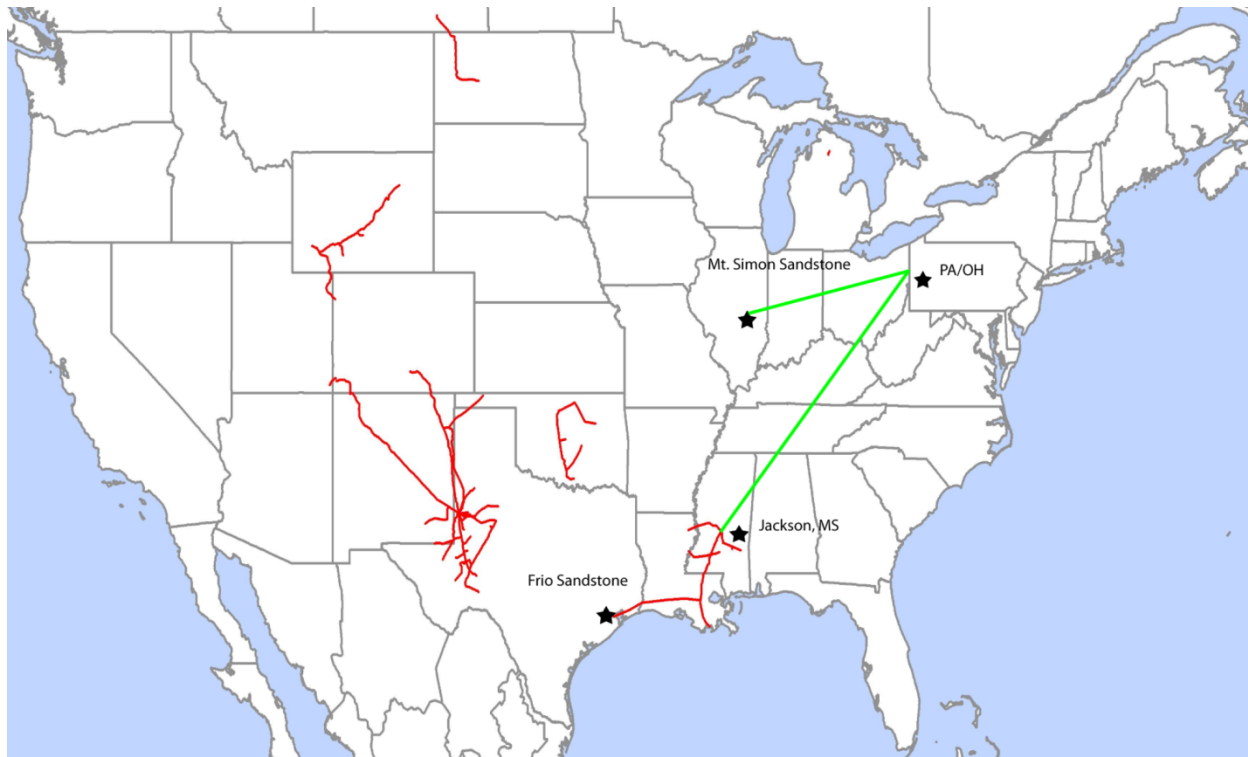

**Figure S9:** Pipeline from PA/OH to the Mt. Simon and Frio Sandstones (15). Red lines represent existing CO<sub>2</sub> pipeline infrastructure; the green lines represent the hypothetical pipeline scenarios we assess in this paper.

## Pipeline Model Annualized Costs

**Table S4:** Pipeline Annualized Costs

|                                                                       | Pipeline Length |         | Proportion of<br>Total Pipeline<br>Length | Annualized Cost |            |
|-----------------------------------------------------------------------|-----------------|---------|-------------------------------------------|-----------------|------------|
|                                                                       | (km)            | (miles) | (%)                                       | (\$/yr)         | (\$/tonne) |
| <b>Volant, PA to Mattoon, IL</b><br>(2 segments; 1 booster station)   |                 |         |                                           |                 |            |
| Northeast Region                                                      | 20              | 12      | 3%                                        | \$47,000,000    | \$8.6      |
| Capital Cost                                                          |                 |         |                                           | \$44,000,000    |            |
| Operational Cost                                                      |                 |         |                                           | \$2,500,000     |            |
| Energy Cost for Booster                                               |                 |         |                                           | \$500,000       |            |
| Midwest Region                                                        | 690             | 429     | 97%                                       | \$41,000,000    | \$7.5      |
| Capital Cost                                                          |                 |         |                                           | \$38,000,000    |            |
| Operational Cost                                                      |                 |         |                                           | \$2,500,000     |            |
| Energy Cost for Booster                                               |                 |         |                                           | \$500,000       |            |
| <b>Total</b>                                                          | 710             | 441     |                                           | \$41,180,000    | \$7.6      |
| <b>Volant, PA to Jackson, MS</b><br>(4 segments; 3 booster stations)  |                 |         |                                           |                 |            |
| Northeast Region                                                      | 20              | 12      | 1%                                        | \$117,000,000   | \$21.5     |
| Capital Cost                                                          |                 |         |                                           | \$109,000,000   |            |
| Operational Cost                                                      |                 |         |                                           | \$6,450,000     |            |
| Energy Cost for Booster                                               |                 |         |                                           | \$1,000,000     |            |
| Midwest Region                                                        | 310             | 193     | 16%                                       | \$103,000,000   | \$18.9     |
| Capital Cost                                                          |                 |         |                                           | \$96,000,000    |            |
| Operational Cost                                                      |                 |         |                                           | \$6,450,000     |            |
| Energy Cost for Booster                                               |                 |         |                                           | \$1,000,000     |            |
| Southeast Region                                                      | 970             | 603     | 49%                                       | \$113,000,000   | \$20.8     |
| Capital Cost                                                          |                 |         |                                           | \$105,000,000   |            |
| Operational Cost                                                      |                 |         |                                           | \$6,450,000     |            |
| Energy Cost for Booster                                               |                 |         |                                           | \$1,000,000     |            |
| <b>Jackson, MS to TX Gulf Coast</b><br>(No new construction required) |                 |         |                                           |                 |            |
| Southeast Region                                                      | 160             | 99      | 8%                                        | \$7,400,000     | \$1.4      |
| Operational Cost                                                      |                 |         |                                           | \$6,450,000     |            |
| Energy Cost for Booster                                               |                 |         |                                           | \$1,00,000      |            |
| Southwest Region                                                      | 540             | 336     | 27%                                       | \$7,400,000     | \$1.4      |
| Operational Cost                                                      |                 |         |                                           | \$6,450,000     |            |
| Energy Cost for Booster                                               |                 |         |                                           | \$1,000,000     |            |
| <b>Total</b>                                                          | 1,860           | 808     |                                           | \$74,526,000    | \$13.7     |



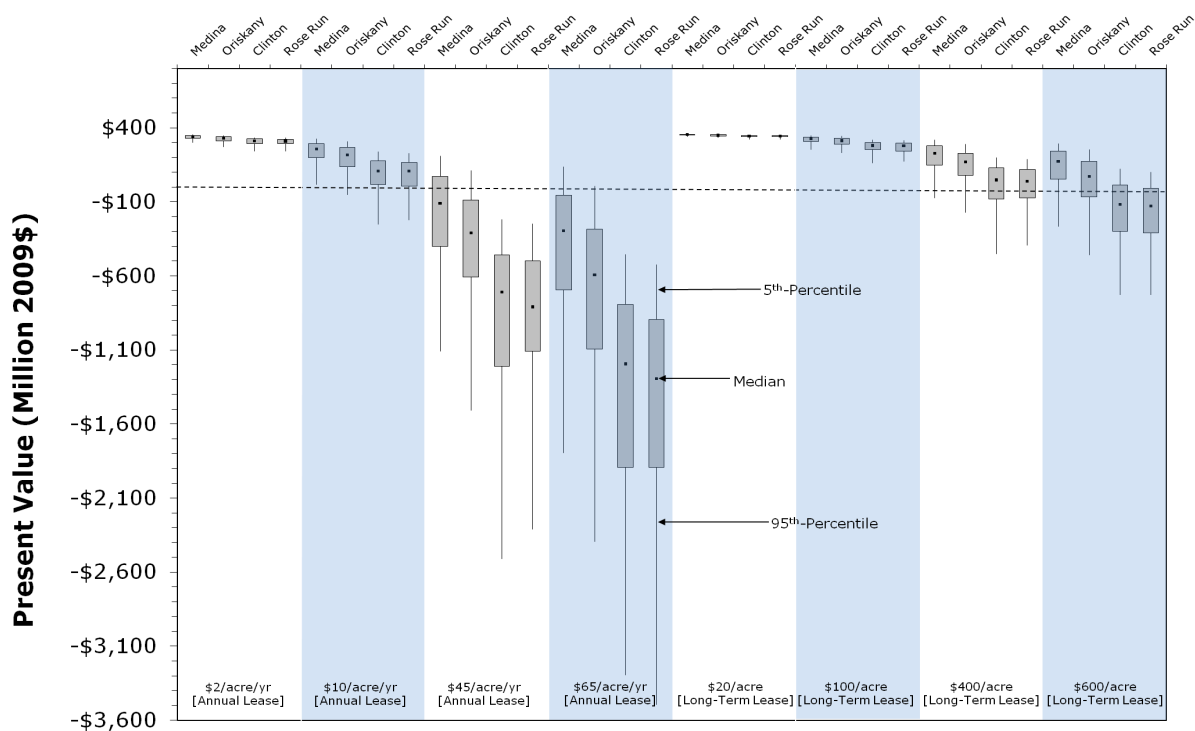

**Figure S10:** Difference between the sum of the Mattoon 30-year pipeline operation cost & 100-year pore space lease cost and the MRCSP sandstone pore space lease costs.

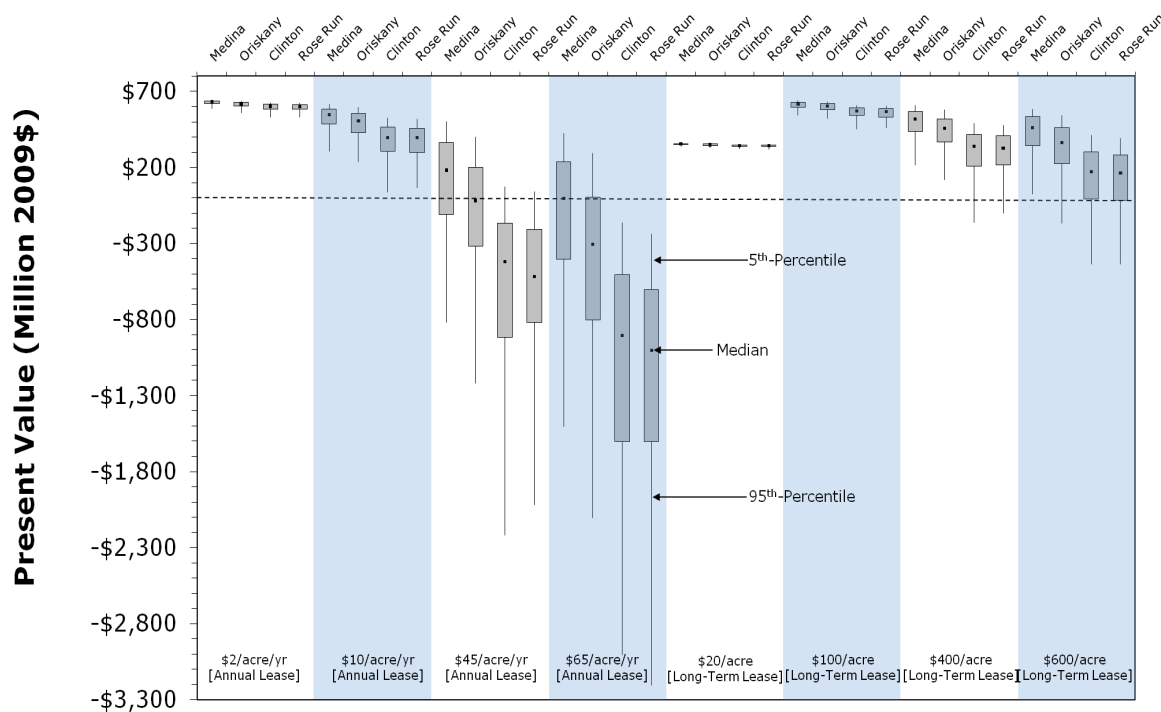

**Figure S11:** Difference between the sum of the Frio 30-year pipeline operation cost & 100-year pore space lease cost and the MRCSP sandstone pore space lease costs.

## Literature Cited

- (1) Athy, L.F. Density, porosity, and compaction in sedimentary rocks. *AAPG Bulletin*. **2005**, *14*(1), 1-24.
- (2) FutureGen Industrial Alliance: Mattoon site environmental information volume 2007. Available at <http://www.futuregenalliance.org/news/evi.stm> (accessed November 14, 2008).
- (3) Wise, P.; Coal Information Coordinator Office of Coal Development, Illinois Department of Commerce and Economic Opportunity, Personal Communication (*Mattoon, IL subsurface geology proposal obtained via email correspondence.*), 2008.
- (4) Brennan, S.T.; Burruss, R.C. Specific storage volumes: A useful tool for CO<sub>2</sub> storage capacity assessment. *Natural Resources Research*. **2006**, *15*(3), 165-182.
- (5) Doughty, C.; Freifeld, B. M.; Trautz, R. C. Site characterization for CO<sub>2</sub> geologic storage and vice versa: the Frio brine pilot, Texas, USA as a case study. *Environ.Geol.* **2008**, *54*(8), 1635-1656.
- (6) McCoy, S.T. *The Economics of CO<sub>2</sub> transport by pipeline and storage in saline aquifers and oil reservoirs*; Carnegie Mellon University: Pittsburgh, PA, 2008. Available at <http://wpweb2.tepper.cmu.edu/ceic/publications.htm> (accessed August 10, 2009).
- (7) Dake, L.P. *Fundamentals of Reservoir Engineering*; Elsevier Science: New York, 1983.
- (8) Woods, E.G.; Comer, A.G. Saturation distribution and injection pressure for a radial gas-storage reservoir. *Journal of Petroleum Technology*. **1962**, *14*(12), 1389-1393.
- (9) U.S. Department of Energy National Energy Technology Laboratory. *Carbon Sequestration Atlas of the United States and Canada*; DOE: Washington, DC, 2007.

Available at [http://www.netl.doe.gov/technologies/carbon\\_seq/refshelf/atlas/](http://www.netl.doe.gov/technologies/carbon_seq/refshelf/atlas/) (accessed December 10, 2008).

- (10) Midwest Regional Carbon Sequestration Partnership: *Characterization of Geologic Sequestration Opportunities in the MRCSP Region* in Phase I Final Report; MRCSP: Columbus, OH, 2005.
- (11) Moody, B.; Executive Director Tuscola Economic Development, Inc. Personal Communication, 2008.
- (12) McCoy, S.T.; Rubin, S.T. An engineering economic model of pipeline transport of CO<sub>2</sub> with application to carbon capture and storage. *Int. J. Greenhouse Gas Control*. **2008**, 2(2), 219-229.
- (13) Bock, B.; Rhuddy, R.; Herzog, H.; Klett, M.; Davison, J.; De La Torre Ugart, D.G.; Simbek, D. Economic evaluation of CO<sub>2</sub> storage and sink enhancement options. *Final Technical Report to the U.S. Department of Energy*. TVA Public Power Institute: Muscle Shoals, AL, 2003.
- (14) Newcomer, A.; Apt, J. Implications of generator siting for CO<sub>2</sub> pipeline infrastructure. *Energy Policy*. 2008, 36,1776-1787.
- (15) *Global Energy Decision Velocity Suite*; Ventyx: Atlanta, GA, 2009. Available at <http://www.ventyx.com>.
